# Supplementary material for: Widespread sex differences in gene expression and splicing in the adult human brain
Source: PubMed Central journal article supplement — Nat Commun. 2013 Nov 22;4:2771. doi: 10.1038/ncomms3771 (PMC3868224; doi:10.1038/ncomms3771), 2013-11-22
Supplement: ncomms3771-s1.pdf [file ncomms3771-s1.pdf]

**SUPPLEMENTARY TABLE S1 - Table showing the number of genes expressed in each CNS region**

| <b>Region</b> | <b>No. of genes expressed</b> |
|---------------|-------------------------------|
| CRBL          | 16,653                        |
| FCTX          | 15,213                        |
| HIPP          | 14,830                        |
| HYP0          | 14,956                        |
| MEDU          | 14,388                        |
| OCTX          | 15,274                        |
| PUTM          | 15,036                        |
| SNIG          | 14,392                        |
| SPCO          | 14,506                        |
| TCTX          | 15,310                        |
| THAL          | 14,599                        |
| WHMT          | 14,078                        |

**SUPPLEMENTARY TABLE S2 - Canonical pathways with evidence of sex-biased expression in at least one CNS region**

| <b>Canonical Pathway</b>                       | <b>Enrichment</b> | <b>CNS Region</b> | <b>p-value</b> |
|------------------------------------------------|-------------------|-------------------|----------------|
| BIOCARTA_STRESS_PATHWAY                        | F>M               | HIPP, WHMT        | 0.001, 0.009   |
| KEGG_LYSOSOME                                  | F>M               | WHMT              | 0.016          |
| KEGG_INSULIN_SIGNALING_PATHWAY                 | F>M               | WHMT              | 0.039          |
| REACTOME_COMPLEMENT_CASCADE                    | F>M               | WHMT              | 0.04           |
| KEGG_CHEMOKINE_SIGNALING_PATHWAY               | F>M               | WHMT              | 0.022          |
| KEGG_LYSOSOME                                  | M>F               | CRBL              | 0.006          |
| KEGG_SNARE_INTERACTIONS_IN_VESICULAR_TRANSPORT | M>F               | SNIG              | 0.006          |

Significant sex-biased enrichment in at least one region (p-value < 0.05, where enrichment p-values were estimated using an empirical permutation-based procedure) was detected for 12 canonical pathways of which 7 could be considered independent.

## Supplementary Note 1. Investigators within the North American Brain Expression Consortium

- Laboratory of Neurogenetics, National Institute on Aging, National Institutes of Health, Bethesda, MD, USA:  
Sampath Arepalli, Mark R Cookson, Allissa Dillman, J Raphael Gibbs, Dena G Hernandez, Michael A Nalls, Andrew Singleton, Bryan Traynor & Marcel van der Brug
- Clinical Research Branch, National Institute on Aging, Baltimore, MD, USA:  
Luigi Ferrucci
- Department of Molecular Neuroscience, UCL Institute of Neurology, London, UK:  
J Raphael Gibbs & Dena G Hernandez
- NICHD Brain and Tissue Bank for Developmental Disorders, University of Maryland Medical School, Baltimore, Maryland 21201, USA:  
Robert Johnson
- Lymphocyte Cell Biology Unit, Laboratory of Immunology, National Institute on Aging, National Institutes of Health, Baltimore, MD, USA:  
Dan L Longo
- Brain Resource Center, Johns Hopkins University, Baltimore, MD, USA:  
Juan Troncoso
- ITGR Biomarker Discovery Group, Genentech, South San Francisco, CA, USA:  
Marcel van der Brug
- NICHD Brain and Tissue Bank for Developmental Disorders, University of Maryland Medical School, Baltimore, Maryland 21201, USA:  
Ronald Zielke
- Research Resources Branch, National Institute on Aging, National Institutes of Health, Bethesda, MD, USA:  
Alan Zonderman
